# Supplementary material for: Molecular Adaptation of rbcL in the Heterophyllous Aquatic Plant Potamogeton
Source: PLoS One. 2009 Feb 27;4(2):e4633. doi: 10.1371/journal.pone.0004633 (PMC2646136; doi:10.1371/journal.pone.0004633)
Supplement: Table S4 — Parameter estimates and log-likelihood values for Potamogeton petA under eight codon substitution models included in PAML. (0.05 MB DOC) [file pone.0004633.s004.doc]

**Table S4** Parameter estimates and log-likelihood values for *Potamogeton* *petA*

under eight codon substitution models included in PAML.

| Model | Log-likelihood | Parameters a |
| --- | --- | --- |
| **Site-specific models** |  |  |
| M0 : one ω | -1467.7 | ω= 0.174 |
| M1A : nearly neutral | -1462.6 | *p0*a = 0.856*,* ω0 = 0.000 |
|  |  | *p1* = 0.144*,* ω1 = 1.000 |
| M2A : positive selection | -1458.0 | *p0* = 0.996*,* ω0 = 0.123 |
|  |  | *p1* = 0.000*,* ω1 = 1.000 |
|  |  | *p2* = 0.004*,* ω2 = 21.287 |
| M7 : beta | -1462.7 | *p* = 0.014, *q* = 0.087 |
| M8 : beta &ωs 1 | -1458.0 | *p0* = 0.996 |
|  |  | *p* =13.934, *q* = 99.000 |
|  |  | *p1* = 0.004, ω1 = 21.295 |
| M8A : beta & ωs=1 | -1462.6 | *p0* = 0.856 |
|  |  | *p* = 0.005, *q* = 2.195 |
| **Branch-site models** |  |  |
| Foreground: Heterophylly |  |  |
| Model A (ω2 = 1 fixed) | -1462.6 | *p0* = 0.856, ω0 = 0.000 |
|  |  | *p1* = 0.144, ω1 = 1.000 |
|  |  | *p2 + p3* = 0.000 , ω2 = 1.000 |
| Model A (ω2 estimated) | -1462.6 | *p0* = 0.856, ω0 = 0.000 |
|  |  | *p1* = 0.144, ω1 = 1.000 |
|  |  | *p2 + p3* = 0.000 , ω2 = 21.295 |
| Foreground: Homophylly |  |  |
| Model A (ω2 = 1 fixed) | -1462.6 | *p0* = 0.856, ω0 = 0.000 |
|  |  | *p1* = 0.144, ω1 = 1.000 |
|  |  | *p2 + p3* = 0.000 , ω2 = 1.000 |
| Model A (ω2 estimated) | -1462.6 | *p0* = 0.856, ω0 = 0.000 |
|  |  | *p1* = 0.144, ω1 = 1.000 |
|  |  | *p2 + p3* = 0.000 , ω2 = 2.000 |

athe proportion (*pi*) of codon sites with ωi. In models M7, M8 and M8A, ω was

drawn from a beta distribution B(*p*, *q*) for a proportion (*p0*) of sites.
